# Supplementary material
Source: publisher figshare collection journal article supplement (https://frontiersin.figshare.com/ndownloader/files/20149679)
Supplement: Supplementary file 1 [file 20149679]

## Sheet: Sheet1
		Table 1_v1. UV-Vis of photoanodes
	Cd0.8Mn0.2Se(1)		Cd0.8Mn0.2Se(2)		Cd0.8Mn0.2Se(3)		Cd0.8Mn0.2Se(4)		Cd0.8Mn0.2Se(5)
	λ(nm)	absorption	λ(nm)	absorption	λ(nm)	absorption	λ(nm)	absorption	λ(nm)	absorption
	700	0.09461	700	0.19065	700	0.23438	700	0.16026	700	0.13451
	699.5	0.09471	699.5	0.1907	699.5	0.23454	699.5	0.16067	1901-11-29 12:00:00	0.13484
	699	0.09478	699	0.19094	699	0.23487	699	0.16117	699	0.13475
	698.5	0.09515	698.5	0.1912	698.5	0.23531	698.5	0.16154	698.5	0.13537
	698	0.09494	698	0.19142	698	0.23541	698	0.16187	698	0.13541
	697.5	0.09514	697.5	0.19162	697.5	0.23583	697.5	0.16229	697.5	0.13581
	697	0.0948	697	0.19131	697	0.2355	697	0.16203	697	0.13594
	696.5	0.09507	696.5	0.19149	696.5	0.23589	696.5	0.16262	696.5	0.1363
	696	0.09542	696	0.19153	696	0.23601	696	0.16286	696	0.13658
	695.5	0.09546	695.5	0.19179	695.5	0.23637	695.5	0.16322	695.5	0.13697
	695	0.09585	695	0.19218	695	0.23675	695	0.16381	695	0.13707
	694.5	0.09613	694.5	0.19223	694.5	0.23693	694.5	0.16409	694.5	0.13732
	694	0.09633	694	0.19265	694	0.23734	694	0.1647	694	0.13769
	693.5	0.09669	693.5	0.19279	693.5	0.23765	693.5	0.1651	693.5	0.13807
	693	0.09647	693	0.19279	693	0.23769	693	0.16504	693	0.13845
	692.5	0.09673	692.5	0.19297	692.5	0.23802	692.5	0.16561	692.5	0.13891
	692	0.09674	692	0.19274	692	0.23795	692	0.1655	692	0.13895
	691.5	0.0969	691.5	0.1932	691.5	0.23839	691.5	0.16602	691.5	0.13954
	691	0.09728	691	0.19317	691	0.23854	691	0.16641	691	0.1395
	690.5	0.09737	690.5	0.19332	690.5	0.23881	690.5	0.16669	690.5	0.13983
	690	0.09776	690	0.19373	690	0.23919	690	0.1675	690	0.14024
	689.5	0.09788	689.5	0.19383	689.5	0.23922	689.5	0.16767	689.5	0.14045
	689	0.09777	689	0.19427	689	0.23964	689	0.16778	689	0.1409
	688.5	0.09811	688.5	0.19452	688.5	0.24022	688.5	0.16827	688.5	0.14136
	688	0.09802	688	0.19433	688	0.24052	688	0.16827	688	0.14138
	687.5	0.09837	687.5	0.19479	687.5	0.24101	687.5	0.16886	687.5	0.14189
	687	0.09848	687	0.19469	687	0.24096	687	0.16913	687	0.14179
	686.5	0.09864	686.5	0.1951	686.5	0.24125	686.5	0.16954	686.5	0.14227
	686	0.09893	686	0.19527	686	0.24142	686	0.17015	686	0.14277
	685.5	0.09916	685.5	0.19525	685.5	0.24171	685.5	0.17041	685.5	0.14298
	685	0.09933	685	0.19572	685	0.24213	685	0.17071	685	0.14374
	684.5	0.09962	684.5	0.1958	684.5	0.24239	684.5	0.17099	684.5	0.14408
	684	0.09957	684	0.19607	684	0.24287	684	0.17099	684	0.14428
	683.5	0.10008	683.5	0.19637	683.5	0.2432	683.5	0.17152	683.5	0.14478
	683	0.10009	683	0.19623	683	0.24353	683	0.17188	683	0.14466
	682.5	0.10035	682.5	0.19655	682.5	0.24389	682.5	0.1723	682.5	0.14524
	682	0.10042	682	0.19645	682	0.24399	682	0.17267	682	0.14539
	681.5	0.10043	681.5	0.1966	681.5	0.24446	681.5	0.173	681.5	0.14579
	681	0.10076	681	0.19692	681	0.24473	681	0.17315	681	0.14635
	680.5	0.10092	680.5	0.19719	680.5	0.24517	680.5	0.17359	680.5	0.14705
	680	0.10105	680	0.19771	680	0.24552	680	0.17367	680	0.14754
	679.5	0.10137	679.5	0.19806	679.5	0.24576	679.5	0.17434	679.5	0.14798
	679	0.10149	679	0.19837	679	0.24622	679	0.17472	679	0.14801
	678.5	0.1019	678.5	0.19876	678.5	0.2466	678.5	0.17541	678.5	0.1484
	678	0.10198	678	0.1985	678	0.24697	678	0.17573	678	0.14887
	677.5	0.10226	677.5	0.19886	677.5	0.2475	677.5	0.17642	677.5	0.14963
	677	0.10253	677	0.1987	677	0.24755	677	0.17643	677	0.15003
	676.5	0.10269	676.5	0.19913	676.5	0.24813	676.5	0.17708	676.5	0.15062
	676	0.10308	676	0.19957	676	0.24831	676	0.17727	676	0.15083
	675.5	0.10328	675.5	0.19986	675.5	0.24887	675.5	0.17795	675.5	0.15137
	675	0.10369	675	0.20036	675	0.24928	675	0.17869	675	0.15181
	674.5	0.10381	674.5	0.2004	674.5	0.24968	674.5	0.17917	674.5	0.15223
	674	0.10408	674	0.20069	674	0.25034	674	0.18005	674	0.15319
	673.5	0.10431	673.5	0.20111	673.5	0.2509	673.5	0.18078	673.5	0.15382
	673	0.10448	673	0.20105	673	0.25142	673	0.18101	673	0.15432
	672.5	0.10461	672.5	0.20136	672.5	0.2522	672.5	0.1816	672.5	0.15484
	672	0.10488	672	0.20158	672	0.25247	672	0.18167	672	0.15495
	671.5	0.10512	671.5	0.20192	671.5	0.25291	671.5	0.18237	671.5	0.1557
	671	0.10541	671	0.20246	671	0.25312	671	0.18298	671	0.15607
	670.5	0.10579	670.5	0.20271	670.5	0.25368	670.5	0.18347	670.5	0.15657
	670	0.10601	670	0.20311	670	0.25429	670	0.18442	670	0.15751
	669.5	0.10636	669.5	0.20339	669.5	0.25484	669.5	0.18476	669.5	0.1579
	669	0.10663	669	0.20364	669	0.25553	669	0.18533	669	0.15863
	668.5	0.10706	668.5	0.20428	668.5	0.2561	668.5	0.18616	668.5	0.15945
	668	0.10732	668	0.20415	668	0.25667	668	0.18647	668	0.15978
	667.5	0.10752	667.5	0.20456	667.5	0.25716	667.5	0.18717	667.5	0.16068
	667	0.10772	667	0.20476	667	0.25751	667	0.18749	667	0.16095
	666.5	0.10797	666.5	0.2051	666.5	0.25825	666.5	0.18839	666.5	0.16173
	666	0.10831	666	0.20559	666	0.25881	666	0.18941	666	0.16265
	665.5	0.10876	665.5	0.20586	665.5	0.25954	665.5	0.18996	665.5	0.16344
	665	0.10901	665	0.20641	665	0.26018	665	0.19057	665	0.16442
	664.5	0.10905	664.5	0.20664	664.5	0.26077	664.5	0.19122	664.5	0.16497
	664	0.10935	664	0.20683	664	0.26161	664	0.19169	664	0.16534
	663.5	0.10954	663.5	0.20718	663.5	0.2623	663.5	0.19268	663.5	0.16605
	663	0.10994	663	0.20729	663	0.26278	663	0.19305	663	0.16652
	662.5	0.11032	662.5	0.20774	662.5	0.26353	662.5	0.19409	662.5	0.16781
	662	0.11047	662	0.20808	662	0.26401	662	0.19491	662	0.1685
	661.5	0.11084	661.5	0.20845	661.5	0.26508	661.5	0.19583	661.5	0.16955
	661	0.11095	661	0.20895	661	0.26561	661	0.19623	661	0.17012
	660.5	0.11147	660.5	0.2095	660.5	0.26653	660.5	0.19719	660.5	0.17113
	660	0.11176	660	0.20981	660	0.26724	660	0.19772	660	0.17178
	659.5	0.11216	659.5	0.21021	659.5	0.26795	659.5	0.19874	659.5	0.17274
	659	0.1124	659	0.21027	659	0.26878	659	0.19949	659	0.17359
	658.5	0.11266	658.5	0.21066	658.5	0.26964	658.5	0.20043	658.5	0.17448
	658	0.11298	658	0.211	658	0.27041	658	0.20113	658	0.17542
	657.5	0.1135	657.5	0.21168	657.5	0.27143	657.5	0.20206	657.5	0.17666
	657	0.1135	657	0.21195	657	0.27206	657	0.20244	657	0.17703
	656.5	0.11399	656.5	0.21248	656.5	0.27306	656.5	0.20363	656.5	0.1782
	656	0.11414	656	0.21273	656	0.27352	656	0.20408	656	0.17861
	655.5	0.11465	655.5	0.21324	655.5	0.27463	655.5	0.20533	655.5	0.17981
	655	0.11506	655	0.21363	655	0.27538	655	0.20628	655	0.18077
	654.5	0.11533	654.5	0.21417	654.5	0.27646	654.5	0.20729	654.5	0.18195
	654	0.11578	654	0.21462	654	0.27731	654	0.2084	654	0.18318
	653.5	0.11613	653.5	0.21506	653.5	0.2784	653.5	0.20951	653.5	0.18459
	653	0.11643	653	0.21544	653	0.27925	653	0.21014	653	0.18528
	652.5	0.11679	652.5	0.21597	652.5	0.28055	652.5	0.21132	652.5	0.18667
	652	0.11689	652	0.21633	652	0.28142	652	0.21163	652	0.18708
	651.5	0.11739	651.5	0.21692	651.5	0.2826	651.5	0.21285	651.5	0.18851
	651	0.11753	651	0.21725	651	0.28326	651	0.21373	651	0.18935
	650.5	0.11792	650.5	0.21772	650.5	0.28432	650.5	0.21489	650.5	0.19055
	650	0.11854	650	0.21803	650	0.28519	650	0.21625	650	0.19198
	649.5	0.11873	649.5	0.21848	649.5	0.28642	649.5	0.21746	649.5	0.19323
	649	0.11937	649	0.21912	649	0.28751	649	0.21843	649	0.19429
	648.5	0.11962	648.5	0.21975	648.5	0.28896	648.5	0.21978	648.5	0.19575
	648	0.11998	648	0.22022	648	0.28978	648	0.22021	648	0.19644
	647.5	0.1205	647.5	0.22069	647.5	0.29112	647.5	0.22159	647.5	0.19788
	647	0.12044	647	0.22084	647	0.29182	647	0.22234	647	0.19872
	646.5	0.12099	646.5	0.22166	646.5	0.29348	646.5	0.22373	646.5	0.20012
	646	0.12084	646	0.2217	646	0.29427	646	0.22472	646	0.2012
	645.5	0.12126	645.5	0.22246	645.5	0.2958	645.5	0.22604	645.5	0.20266
	645	0.12179	645	0.22282	645	0.29662	645	0.22708	645	0.20374
	644.5	0.12224	644.5	0.22344	644.5	0.29812	644.5	0.22856	644.5	0.20534
	644	0.12284	644	0.22409	644	0.2992	644	0.22933	644	0.20619
	643.5	0.12318	643.5	0.2246	643.5	0.30063	643.5	0.23075	643.5	0.20763
	643	0.12343	643	0.22521	643	0.3016	643	0.2317	643	0.20875
	642.5	0.12402	642.5	0.22584	642.5	0.30309	642.5	0.23302	642.5	0.21033
	642	0.12393	642	0.2261	642	0.30406	642	0.23406	642	0.21147
	641.5	0.12435	641.5	0.22684	641.5	0.30561	641.5	0.23562	641.5	0.2132
	641	0.12444	641	0.22699	641	0.30648	641	0.23665	641	0.214
	640.5	0.12494	640.5	0.22776	640.5	0.30806	640.5	0.23844	640.5	0.21585
	640	0.12557	640	0.22824	640	0.30917	640	0.23924	640	0.21687
	639.5	0.12613	639.5	0.22888	639.5	0.31096	639.5	0.24091	639.5	0.21876
	639	0.12672	639	0.22968	639	0.31218	639	0.24208	639	0.22012
	638.5	0.12701	638.5	0.23025	638.5	0.31366	638.5	0.2436	638.5	0.22169
	638	0.12717	638	0.23094	638	0.31482	638	0.24487	638	0.22291
	637.5	0.12765	637.5	0.23148	637.5	0.31616	637.5	0.24627	637.5	0.22467
	637	0.12756	637	0.23179	637	0.3172	637	0.24745	637	0.22544
	636.5	0.12819	636.5	0.23277	636.5	0.31894	636.5	0.2494	636.5	0.22739
	636	0.12849	636	0.23308	636	0.31996	636	0.25028	636	0.2282
	635.5	0.12894	635.5	0.23374	635.5	0.32175	635.5	0.25202	635.5	0.22998
	635	0.1294	635	0.23422	635	0.32267	635	0.25312	635	0.23129
	634.5	0.12972	634.5	0.23484	634.5	0.32433	634.5	0.25462	634.5	0.23287
	634	0.13042	634	0.23583	634	0.32574	634	0.25627	634	0.2345
	633.5	0.13092	633.5	0.23664	633.5	0.32745	633.5	0.258	633.5	0.23633
	633	0.13106	633	0.2372	633	0.32862	633	0.25923	633	0.23722
	632.5	0.13159	632.5	0.23808	632.5	0.33011	632.5	0.26099	632.5	0.23878
	632	0.13159	632	0.23822	632	0.33122	632	0.26163	632	0.23959
	631.5	0.13201	631.5	0.23884	631.5	0.33302	631.5	0.26338	631.5	0.2413
	631	0.13239	631	0.23915	631	0.33425	631	0.26444	631	0.2428
	630.5	0.13252	630.5	0.23982	630.5	0.33586	630.5	0.26618	630.5	0.24439
	630	0.13321	630	0.24078	630	0.33702	630	0.26801	630	0.24589
	629.5	0.13349	629.5	0.24136	629.5	0.33846	629.5	0.26953	629.5	0.24741
	629	0.13413	629	0.24233	629	0.33973	629	0.27099	629	0.24863
	628.5	0.13472	628.5	0.24292	628.5	0.34123	628.5	0.27272	628.5	0.25033
	628	0.13479	628	0.24355	628	0.34242	628	0.27372	628	0.25134
	627.5	0.13535	627.5	0.24433	627.5	0.34394	627.5	0.27559	627.5	0.25296
	627	0.13532	627	0.24452	627	0.34508	627	0.27669	627	0.25425
	626.5	0.13606	626.5	0.24541	626.5	0.3469	626.5	0.27887	626.5	0.2559
	626	0.1362	626	0.24572	626	0.34789	626	0.28029	626	0.25695
	625.5	0.13675	625.5	0.24662	625.5	0.34963	625.5	0.28223	625.5	0.25859
	625	0.1372	625	0.2475	625	0.35071	625	0.28367	625	0.25957
	624.5	0.13759	624.5	0.24829	624.5	0.35241	624.5	0.28542	624.5	0.26121
	624	0.13798	624	0.24917	624	0.35355	624	0.28656	624	0.26242
	623.5	0.13835	623.5	0.24974	623.5	0.35492	623.5	0.28836	623.5	0.26396
	623	0.13847	623	0.25017	623	0.35612	623	0.28959	623	0.26534
	622.5	0.13899	622.5	0.25116	622.5	0.35759	622.5	0.2915	622.5	0.26692
	622	0.13948	622	0.25155	622	0.35888	622	0.29289	622	0.26796
	621.5	0.14008	621.5	0.25245	621.5	0.3605	621.5	0.29492	621.5	0.26961
	621	0.1406	621	0.25309	621	0.36164	621	0.29631	621	0.27039
	620.5	0.14084	620.5	0.25393	620.5	0.36311	620.5	0.29824	620.5	0.27189
	620	0.14121	620	0.25479	620	0.36409	620	0.29925	620	0.27293
	619.5	0.14165	619.5	0.25548	619.5	0.36557	619.5	0.30096	619.5	0.27437
	619	0.142	619	0.25632	619	0.36662	619	0.30237	619	0.27596
	618.5	0.14257	618.5	0.2571	618.5	0.36809	618.5	0.30422	618.5	0.27762
	618	0.14279	618	0.25751	618	0.36917	618	0.30597	618	0.27872
	617.5	0.14325	617.5	0.25848	617.5	0.3706	617.5	0.30783	617.5	0.28001
	617	0.14359	617	0.25894	617	0.37159	617	0.30909	617	0.28046
	616.5	0.14416	616.5	0.25986	616.5	0.37305	616.5	0.31086	616.5	0.28182
	616	0.14455	616	0.26032	616	0.37392	616	0.3117	616	0.28279
	615.5	0.14513	615.5	0.26115	615.5	0.37535	615.5	0.31374	615.5	0.28438
	615	0.1455	615	0.26201	615	0.37629	615	0.31504	615	0.28574
	614.5	0.14612	614.5	0.26284	614.5	0.37774	614.5	0.3169	614.5	0.28706
	614	0.14632	614	0.26344	614	0.3787	614	0.31849	614	0.28798
	613.5	0.14683	613.5	0.26446	613.5	0.38009	613.5	0.32043	613.5	0.28933
	613	0.14716	613	0.26499	613	0.38113	613	0.32192	613	0.29002
	612.5	0.14772	612.5	0.26609	612.5	0.38261	612.5	0.3238	612.5	0.29139
	612	0.1482	612	0.26647	612	0.38351	612	0.32467	612	0.2923
	611.5	0.14886	611.5	0.26724	611.5	0.38478	611.5	0.32669	611.5	0.29375
	611	0.14928	611	0.26797	611	0.38566	611	0.32787	611	0.29495
	610.5	0.14965	610.5	0.26874	610.5	0.38685	610.5	0.32965	610.5	0.29602
	610	0.15001	610	0.2696	610	0.3877	610	0.33116	610	0.29689
	609.5	0.15058	609.5	0.27039	609.5	0.38884	609.5	0.33282	609.5	0.29817
	609	0.15105	609	0.2711	609	0.38977	609	0.33456	609	0.29911
	608.5	0.15155	608.5	0.27199	608.5	0.39095	608.5	0.33616	608.5	0.3002
	608	0.15206	608	0.27254	608	0.39186	608	0.33724	608	0.30125
	607.5	0.15244	607.5	0.27354	607.5	0.39319	607.5	0.33903	607.5	0.30227
	607	0.15296	607	0.27405	607	0.39402	607	0.34019	607	0.30343
	606.5	0.15347	606.5	0.27483	606.5	0.3952	606.5	0.3421	606.5	0.30457
	606	0.15379	606	0.27542	606	0.3959	606	0.34327	606	0.3051
	605.5	0.15439	605.5	0.27644	605.5	0.39688	605.5	0.34485	605.5	0.3061
	605	0.15464	605	0.27724	605	0.39774	605	0.34625	605	0.30675
	604.5	0.1553	604.5	0.27829	604.5	0.39896	604.5	0.34803	604.5	0.30787
	604	0.15585	604	0.27894	604	0.39995	604	0.34947	604	0.30905
	603.5	0.15632	603.5	0.27953	603.5	0.40095	603.5	0.35112	603.5	0.30998
	603	0.15698	603	0.28001	603	0.40163	603	0.35215	603	0.31084
	602.5	0.15743	602.5	0.28065	602.5	0.4027	602.5	0.35351	602.5	0.31183
	602	0.15798	602	0.28148	602	0.40337	602	0.35464	602	0.31229
	601.5	0.1585	601.5	0.28231	601.5	0.40445	601.5	0.35639	601.5	0.3136
	601	0.15871	601	0.28306	601	0.40498	601	0.3576	601	0.31399
	600.5	0.15947	600.5	0.28411	600.5	0.40608	600.5	0.35942	600.5	0.31492
	600	0.15995	600	0.28473	600	0.4069	600	0.36022	600	0.31547
	599.5	0.16057	599.5	0.28577	599.5	0.40802	599.5	0.36178	599.5	0.31633
	599	0.16131	599	0.28655	599	0.40887	599	0.36294	599	0.31722
	598.5	0.16199	598.5	0.28738	598.5	0.40965	598.5	0.36459	598.5	0.31815
	598	0.16256	598	0.28804	598	0.41024	598	0.36612	598	0.31912
	597.5	0.16304	597.5	0.28866	597.5	0.41081	597.5	0.36736	597.5	0.31977
	597	0.16335	597	0.28914	597	0.41127	597	0.36825	597	0.32005
	596.5	0.16401	596.5	0.2901	596.5	0.41238	596.5	0.37005	596.5	0.32119
	596	0.1644	596	0.29059	596	0.41287	596	0.37068	596	0.32165
	595.5	0.16524	595.5	0.29164	595.5	0.41395	595.5	0.37255	595.5	0.32271
	595	0.16572	595	0.29222	595	0.41446	595	0.37321	595	0.32321
	594.5	0.16632	594.5	0.29298	594.5	0.41517	594.5	0.37458	594.5	0.32398
	594	0.16673	594	0.29358	594	0.41572	594	0.37577	594	0.32455
	593.5	0.1673	593.5	0.29429	593.5	0.41649	593.5	0.37703	593.5	0.32535
	593	0.16775	593	0.29506	593	0.41721	593	0.37816	593	0.32578
	592.5	0.16859	592.5	0.29597	592.5	0.4181	592.5	0.37969	592.5	0.32642
	592	0.16932	592	0.29659	592	0.41884	592	0.38059	592	0.32704
	591.5	0.16999	591.5	0.29711	591.5	0.41955	591.5	0.38186	591.5	0.32758
	591	0.17042	591	0.29759	591	0.41986	591	0.3826	591	0.32834
	590.5	0.17117	590.5	0.29842	590.5	0.42052	590.5	0.38399	590.5	0.32933
	590	0.17185	590	0.29917	590	0.42114	590	0.3852	590	0.32992
	589.5	0.17261	589.5	0.30021	589.5	0.42206	589.5	0.38664	589.5	0.33066
	589	0.1728	589	0.3007	589	0.42238	589	0.38728	589	0.33074
	588.5	0.17348	588.5	0.30144	588.5	0.42285	588.5	0.38837	588.5	0.33123
	588	0.17399	588	0.30191	588	0.42327	588	0.38914	588	0.33194
	587.5	0.175	587.5	0.30271	587.5	0.42414	587.5	0.39048	587.5	0.33267
	587	0.1757	587	0.30332	587	0.42462	587	0.39162	587	0.33351
	586.5	0.17648	586.5	0.30418	586.5	0.42536	586.5	0.39298	586.5	0.33412
	586	0.17706	586	0.30483	586	0.42577	586	0.39418	586	0.3347
	585.5	0.17799	585.5	0.30572	585.5	0.4263	585.5	0.39552	585.5	0.33551
	585	0.17858	585	0.30627	585	0.42694	585	0.39596	585	0.33552
	584.5	0.17968	584.5	0.3073	584.5	0.42768	584.5	0.39728	584.5	0.33587
	584	0.18013	584	0.3079	584	0.42828	584	0.3977	584	0.33638
	583.5	0.18085	583.5	0.30887	583.5	0.42864	583.5	0.39912	583.5	0.33683
	583	0.18144	583	0.3093	583	0.42914	583	0.40007	583	0.33782
	582.5	0.18212	582.5	0.30995	582.5	0.4296	582.5	0.4012	582.5	0.33821
	582	0.18309	582	0.31058	582	0.43021	582	0.40236	582	0.33888
	581.5	0.18389	581.5	0.31131	581.5	0.43083	581.5	0.40337	581.5	0.33942
	581	0.18483	581	0.31212	581	0.43136	581	0.40423	581	0.33975
	580.5	0.18582	580.5	0.31308	580.5	0.43191	580.5	0.40556	580.5	0.34043
	580	0.18631	580	0.31371	580	0.43241	580	0.40582	580	0.34069
	579.5	0.18724	579.5	0.31437	579.5	0.43291	579.5	0.40698	579.5	0.34118
	579	0.18745	579	0.31464	579	0.43335	579	0.4075	579	0.34162
	578.5	0.18838	578.5	0.3154	578.5	0.43374	578.5	0.40867	578.5	0.34224
	578	0.18909	578	0.31592	578	0.43419	578	0.4098	578	0.3426
	577.5	0.19024	577.5	0.31691	577.5	0.4348	577.5	0.41085	577.5	0.34313
	577	0.1913	577	0.31751	577	0.43522	577	0.41171	577	0.34335
	576.5	0.19224	576.5	0.31832	576.5	0.43568	576.5	0.41277	576.5	0.34381
	576	0.19309	576	0.31918	576	0.43614	576	0.41346	576	0.34434
	575.5	0.19401	575.5	0.32	575.5	0.4366	575.5	0.41461	575.5	0.34493
	575	0.19442	575	0.32062	575	0.43698	575	0.41513	575	0.34542
	574.5	0.19566	574.5	0.32142	574.5	0.43744	574.5	0.41593	574.5	0.34596
	574	0.1961	574	0.32164	574	0.43779	574	0.41654	574	0.3459
	573.5	0.19733	573.5	0.3226	573.5	0.43827	573.5	0.41763	573.5	0.34658
	573	0.19795	573	0.32286	573	0.43861	573	0.41842	573	0.34663
	572.5	0.1991	572.5	0.32376	572.5	0.43934	572.5	0.41949	572.5	0.34714
	572	0.20022	572	0.32436	572	0.43973	572	0.41996	572	0.34778
	571.5	0.20123	571.5	0.32504	571.5	0.44016	571.5	0.42077	571.5	0.34815
	571	0.20214	571	0.3259	571	0.44048	571	0.42146	571	0.34881
	570.5	0.20328	570.5	0.32664	570.5	0.44116	570.5	0.42234	570.5	0.34926
	570	0.20381	570	0.3273	570	0.44155	570	0.4233	570	0.34936
	569.5	0.20515	569.5	0.32824	569.5	0.44213	569.5	0.42428	569.5	0.34995
	569	0.20574	569	0.32847	569	0.44218	569	0.42494	569	0.34997
	568.5	0.20711	568.5	0.32947	568.5	0.44277	568.5	0.4261	568.5	0.3505
	568	0.20776	568	0.32978	568	0.4429	568	0.42636	568	0.3508
	567.5	0.20887	567.5	0.33077	567.5	0.44364	567.5	0.4276	567.5	0.35124
	567	0.20983	567	0.33143	567	0.4439	567	0.42826	567	0.35164
	566.5	0.21101	566.5	0.33213	566.5	0.44429	566.5	0.42908	566.5	0.35195
	566	0.21189	566	0.33278	566	0.44471	566	0.43016	566	0.3522
	565.5	0.2131	565.5	0.33346	565.5	0.44511	565.5	0.43077	565.5	0.35277
	565	0.21393	565	0.33413	565	0.44566	565	0.43163	565	0.35329
	564.5	0.21512	564.5	0.33497	564.5	0.44603	564.5	0.43239	564.5	0.3536
	564	0.21587	564	0.33524	564	0.44633	564	0.43268	564	0.35417
	563.5	0.21714	563.5	0.33616	563.5	0.44686	563.5	0.43359	563.5	0.35469
	563	0.21815	563	0.33659	563	0.44706	563	0.4342	563	0.35519
	562.5	0.21963	562.5	0.33736	562.5	0.44754	562.5	0.43489	562.5	0.35562
	562	0.22057	562	0.33795	562	0.44766	562	0.43583	562	0.35558
	561.5	0.222	561.5	0.33874	561.5	0.44797	561.5	0.43665	561.5	0.35602
	561	0.22276	561	0.33963	561	0.44842	561	0.43762	561	0.35649
	560.5	0.22403	560.5	0.34044	560.5	0.44886	560.5	0.43846	560.5	0.3568
	560	0.22494	560	0.3411	560	0.44965	560	0.43889	560	0.35748
	559.5	0.2262	559.5	0.34182	559.5	0.45005	559.5	0.43968	559.5	0.3579
	559	0.22722	559	0.34207	559	0.45042	559	0.44009	559	0.35827
	558.5	0.22853	558.5	0.34298	558.5	0.45053	558.5	0.44105	558.5	0.35897
	558	0.22942	558	0.34339	558	0.45047	558	0.44165	558	0.35887
	557.5	0.23091	557.5	0.34427	557.5	0.45091	557.5	0.44251	557.5	0.35946
	557	0.23184	557	0.34479	557	0.45102	557	0.44311	557	0.35941
	556.5	0.23345	556.5	0.34538	556.5	0.45165	556.5	0.4442	556.5	0.35996
	556	0.23434	556	0.34612	556	0.45209	556	0.44475	556	0.36063
	555.5	0.23548	555.5	0.34692	555.5	0.45245	555.5	0.44563	555.5	0.36105
	555	0.2366	555	0.34756	555	0.453	555	0.44625	555	0.36143
	554.5	0.23811	554.5	0.34849	554.5	0.45353	554.5	0.44696	554.5	0.36192
	554	0.23965	554	0.3489	554	0.45405	554	0.44798	554	0.36201
	553.5	0.24137	553.5	0.34992	553.5	0.45463	553.5	0.44905	553.5	0.36269
	553	0.24217	553	0.35022	553	0.45455	553	0.44958	553	0.36281
	552.5	0.24365	552.5	0.35094	552.5	0.45483	552.5	0.45043	552.5	0.36313
	552	0.24418	552	0.35144	552	0.45476	552	0.45039	552	0.36355
	551.5	0.24566	551.5	0.35209	551.5	0.45521	551.5	0.45123	551.5	0.36413
	551	0.24665	551	0.35275	551	0.45553	551	0.45186	551	0.36446
	550.5	0.24829	550.5	0.35361	550.5	0.45601	550.5	0.45294	550.5	0.36497
	550	0.24957	550	0.3543	550	0.45649	550	0.45386	550	0.36502
	549.5	0.25076	549.5	0.35501	549.5	0.45662	549.5	0.45453	549.5	0.36539
	549	0.25198	549	0.35555	549	0.45709	549	0.45513	549	0.36582
	548.5	0.25339	548.5	0.35622	548.5	0.45739	548.5	0.45607	548.5	0.36633
	548	0.25441	548	0.35674	548	0.45773	548	0.45638	548	0.36682
	547.5	0.25604	547.5	0.35748	547.5	0.45829	547.5	0.45753	547.5	0.3674
	547	0.2567	547	0.35794	547	0.45838	547	0.45797	547	0.36735
	546.5	0.25812	546.5	0.35881	546.5	0.45881	546.5	0.45872	546.5	0.36801
	546	0.25913	546	0.35924	546	0.45899	546	0.45929	546	0.36806
	545.5	0.26077	545.5	0.36022	545.5	0.45918	545.5	0.46002	545.5	0.36858
	545	0.26225	545	0.36071	545	0.45968	545	0.46076	545	0.36899
	544.5	0.26359	544.5	0.36154	544.5	0.45986	544.5	0.46166	544.5	0.36943
	544	0.2647	544	0.362	544	0.4604	544	0.46214	544	0.37011
	543.5	0.2662	543.5	0.36267	543.5	0.46073	543.5	0.46309	543.5	0.37068
	543	0.26717	543	0.36328	543	0.46107	543	0.46377	543	0.37077
	542.5	0.26885	542.5	0.36397	542.5	0.46159	542.5	0.46459	542.5	0.37136
	542	0.26964	542	0.36453	542	0.46139	542	0.46519	542	0.37131
	541.5	0.27131	541.5	0.36523	541.5	0.46176	541.5	0.46595	541.5	0.37175
	541	0.27245	541	0.36569	541	0.46188	541	0.46649	541	0.37222
	540.5	0.27393	540.5	0.36653	540.5	0.46244	540.5	0.46756	540.5	0.37269
	540	0.27525	540	0.3669	540	0.46279	540	0.46791	540	0.37324
	539.5	0.2767	539.5	0.36755	539.5	0.46297	539.5	0.46851	539.5	0.37365
	539	0.27786	539	0.3681	539	0.46351	539	0.46925	539	0.37395
	538.5	0.27942	538.5	0.36877	538.5	0.46376	538.5	0.47	538.5	0.37422
	538	0.28046	538	0.36941	538	0.46406	538	0.47104	538	0.37441
	537.5	0.28218	537.5	0.37008	537.5	0.46451	537.5	0.47193	537.5	0.3749
	537	0.28322	537	0.37064	537	0.46456	537	0.47242	537	0.37545
	536.5	0.28468	536.5	0.37146	536.5	0.46485	536.5	0.47347	536.5	0.37588
	536	0.28576	536	0.37179	536	0.46478	536	0.47354	536	0.37612
	535.5	0.28744	535.5	0.37263	535.5	0.46512	535.5	0.47455	535.5	0.37671
	535	0.28868	535	0.37289	535	0.46545	535	0.47496	535	0.37665
	534.5	0.29039	534.5	0.37359	534.5	0.46582	534.5	0.47557	534.5	0.37723
	534	0.29129	534	0.37407	534	0.46616	534	0.47645	534	0.3775
	533.5	0.29291	533.5	0.37481	533.5	0.46661	533.5	0.47745	533.5	0.37805
	533	0.29386	533	0.37558	533	0.46683	533	0.47833	533	0.37865
	532.5	0.29535	532.5	0.37599	532.5	0.4672	532.5	0.47925	532.5	0.37899
	532	0.29652	532	0.37645	532	0.46714	532	0.47931	532	0.37907
	531.5	0.29807	531.5	0.3771	531.5	0.46739	531.5	0.4801	531.5	0.37958
	531	0.29924	531	0.3774	531	0.46763	531	0.48051	531	0.37946
	530.5	0.3009	530.5	0.3782	530.5	0.46798	530.5	0.48156	530.5	0.38026
	530	0.30161	530	0.3784	530	0.46816	530	0.4821	530	0.3804
	529.5	0.30329	529.5	0.37893	529.5	0.46856	529.5	0.4829	529.5	0.38079
	529	0.30383	529	0.37939	529	0.46889	529	0.48344	529	0.38132
	528.5	0.3053	528.5	0.37989	528.5	0.46901	528.5	0.48436	528.5	0.38166
	528	0.30637	528	0.38058	528	0.46909	528	0.48481	528	0.38196
	527.5	0.30788	527.5	0.38117	527.5	0.46916	527.5	0.48547	527.5	0.38238
	527	0.30931	527	0.38199	527	0.46937	527	0.4861	527	0.38234
	526.5	0.31076	526.5	0.38267	526.5	0.46976	526.5	0.48665	526.5	0.38274
	526	0.31174	526	0.38278	526	0.47001	526	0.48733	526	0.38304
	525.5	0.31317	525.5	0.38332	525.5	0.47026	525.5	0.48823	525.5	0.38345
	525	0.31381	525	0.3834	525	0.47025	525	0.48888	525	0.38368
	524.5	0.31536	524.5	0.38403	524.5	0.47047	524.5	0.48993	524.5	0.38419
	524	0.31613	524	0.38442	524	0.47066	524	0.49002	524	0.38423
	523.5	0.31751	523.5	0.38511	523.5	0.47087	523.5	0.49063	523.5	0.38445
	523	0.31853	523	0.38572	523	0.47099	523	0.49099	523	0.3845
	522.5	0.32013	522.5	0.38616	522.5	0.47126	522.5	0.49168	522.5	0.38487
	522	0.32144	522	0.38641	522	0.47141	522	0.49258	522	0.38546
	521.5	0.32304	521.5	0.38714	521.5	0.47184	521.5	0.49345	521.5	0.38586
	521	0.32387	521	0.3874	521	0.47208	521	0.4942	521	0.38628
	520.5	0.32513	520.5	0.3881	520.5	0.47237	520.5	0.49531	520.5	0.38663
	520	0.32546	520	0.38892	520	0.47304	520	0.49453	520	0.38532
	519.5	0.32693	519.5	0.38932	519.5	0.47336	519.5	0.49538	519.5	0.38567
	519	0.32772	519	0.38967	519	0.47344	519	0.49561	519	0.38597
	518.5	0.3291	518.5	0.3901	518.5	0.47367	518.5	0.49637	518.5	0.38648
	518	0.32941	518	0.39017	518	0.47381	518	0.49681	518	0.38641
	517.5	0.33092	517.5	0.39068	517.5	0.47397	517.5	0.49767	517.5	0.38682
	517	0.33189	517	0.39071	517	0.47392	517	0.49803	517	0.38657
	516.5	0.33323	516.5	0.39122	516.5	0.47437	516.5	0.4991	516.5	0.38697
	516	0.33422	516	0.39159	516	0.47442	516	0.49932	516	0.38746
	515.5	0.33523	515.5	0.39189	515.5	0.47461	515.5	0.50027	515.5	0.38748
	515	0.33617	515	0.39233	515	0.47455	515	0.50071	515	0.38794
	514.5	0.33742	514.5	0.39277	514.5	0.47482	514.5	0.5013	514.5	0.38822
	514	0.33791	514	0.39314	514	0.47501	514	0.50192	514	0.38832
	513.5	0.33916	513.5	0.39352	513.5	0.4751	513.5	0.50232	513.5	0.38834
	513	0.33994	513	0.39355	513	0.4753	513	0.50277	513	0.38818
	512.5	0.34113	512.5	0.39387	512.5	0.47547	512.5	0.50358	512.5	0.38856
	512	0.34166	512	0.39357	512	0.47534	512	0.50361	512	0.38877
	511.5	0.34272	511.5	0.39386	511.5	0.47538	511.5	0.50423	511.5	0.38889
	511	0.34352	511	0.39404	511	0.4753	511	0.50459	511	0.38903
	510.5	0.34468	510.5	0.39447	510.5	0.47576	510.5	0.50528	510.5	0.38938
	510	0.34531	510	0.39486	510	0.47587	510	0.50607	510	0.38931
	509.5	0.34637	509.5	0.39502	509.5	0.47589	509.5	0.50667	509.5	0.38961
	509	0.34704	509	0.39539	509	0.47616	509	0.50721	509	0.38966
	508.5	0.34804	508.5	0.39542	508.5	0.47605	508.5	0.50776	508.5	0.38949
	508	0.3487	508	0.39546	508	0.47606	508	0.50782	508	0.38965
	507.5	0.35002	507.5	0.39608	507.5	0.47593	507.5	0.50869	507.5	0.38997
	507	0.3507	507	0.39606	507	0.47606	507	0.50911	507	0.39026
	506.5	0.35154	506.5	0.39642	506.5	0.47633	506.5	0.50968	506.5	0.39063
	506	0.35182	506	0.39635	506	0.4761	506	0.50999	506	0.39002
	505.5	0.35296	505.5	0.39674	505.5	0.47629	505.5	0.51052	505.5	0.39023
	505	0.35337	505	0.39685	505	0.47626	505	0.511	505	0.39031
	504.5	0.35425	504.5	0.39701	504.5	0.47626	504.5	0.51158	504.5	0.39045
	504	0.35465	504	0.39726	504	0.47644	504	0.51173	504	0.39081
	503.5	0.35535	503.5	0.39733	503.5	0.47643	503.5	0.5122	503.5	0.39065
	503	0.35606	503	0.39724	503	0.4766	503	0.51278	503	0.39073
	502.5	0.35689	502.5	0.39739	502.5	0.4766	502.5	0.5133	502.5	0.3909
	502	0.35755	502	0.39739	502	0.47657	502	0.51386	502	0.39072
	501.5	0.35841	501.5	0.39759	501.5	0.4769	501.5	0.51401	501.5	0.39066
	501	0.35866	501	0.39761	501	0.47653	501	0.51404	501	0.39075
	500.5	0.35939	500.5	0.39763	500.5	0.47673	500.5	0.51498	500.5	0.3909
	500	0.35949	500	0.39759	500	0.47668	500	0.51505	500	0.3911
	499.5	0.36008	499.5	0.39762	499.5	0.47678	499.5	0.51585	499.5	0.39108
	499	0.36048	499	0.39761	499	0.47696	499	0.51597	499	0.39085
	498.5	0.3609	498.5	0.39756	498.5	0.47691	498.5	0.51626	498.5	0.39083
	498	0.36155	498	0.39757	498	0.47712	498	0.51699	498	0.39102
	497.5	0.36227	497.5	0.3977	497.5	0.47731	497.5	0.51765	497.5	0.39117
	497	0.36268	497	0.39784	497	0.47734	497	0.51808	497	0.39152
	496.5	0.3633	496.5	0.39814	496.5	0.47742	496.5	0.51846	496.5	0.39159
	496	0.36327	496	0.39845	496	0.47731	496	0.51846	496	0.3919
	495.5	0.36401	495.5	0.39841	495.5	0.47758	495.5	0.51879	495.5	0.39198
	495	0.36422	495	0.39842	495	0.47747	495	0.51901	495	0.39155
	494.5	0.36476	494.5	0.39847	494.5	0.47762	494.5	0.51956	494.5	0.39182
	494	0.36498	494	0.39844	494	0.47769	494	0.52019	494	0.39157
	493.5	0.36546	493.5	0.39843	493.5	0.47757	493.5	0.5205	493.5	0.39172
	493	0.3659	493	0.39814	493	0.47768	493	0.5207	493	0.39184
	492.5	0.36622	492.5	0.39819	492.5	0.47784	492.5	0.52114	492.5	0.39186
	492	0.3662	492	0.39839	492	0.47806	492	0.52141	492	0.39197
	491.5	0.36646	491.5	0.39847	491.5	0.47834	491.5	0.52212	491.5	0.39201
	491	0.3665	491	0.39863	491	0.47831	491	0.52242	491	0.39165
	490.5	0.36675	490.5	0.39862	490.5	0.47827	490.5	0.5229	490.5	0.39184
	490	0.36692	490	0.39862	490	0.47827	490	0.52321	490	0.39179
	489.5	0.36718	489.5	0.39892	489.5	0.47832	489.5	0.52388	489.5	0.39205
	489	0.36748	489	0.39875	489	0.47851	489	0.52411	489	0.39224
	488.5	0.368	488.5	0.39904	488.5	0.47892	488.5	0.5246	488.5	0.39239
	488	0.36812	488	0.39874	488	0.4791	488	0.52435	488	0.39227
	487.5	0.36818	487.5	0.39869	487.5	0.47922	487.5	0.52474	487.5	0.39237
	487	0.36798	487	0.39868	487	0.47939	487	0.52521	487	0.39235
	486.5	0.36845	486.5	0.39873	486.5	0.47958	486.5	0.52573	486.5	0.39231
	486	0.36898	486	0.39913	486	0.47976	486	0.52641	486	0.39265
	485.5	0.36927	485.5	0.39905	485.5	0.47974	485.5	0.52686	485.5	0.39265
	485	0.36976	485	0.39928	485	0.47999	485	0.52728	485	0.39319
	484.5	0.36994	484.5	0.39932	484.5	0.48006	484.5	0.52808	484.5	0.39333
	484	0.37028	484	0.39917	484	0.48033	484	0.52819	484	0.3931
	483.5	0.37044	483.5	0.39922	483.5	0.48049	483.5	0.52849	483.5	0.39335
	483	0.37005	483	0.39901	483	0.48063	483	0.52873	483	0.39317
	482.5	0.37021	482.5	0.39925	482.5	0.48085	482.5	0.52887	482.5	0.3934
	482	0.37022	482	0.39944	482	0.48094	482	0.52941	482	0.39364
	481.5	0.3707	481.5	0.39963	481.5	0.48127	481.5	0.52989	481.5	0.39352
	481	0.37095	481	0.39999	481	0.48142	481	0.53019	481	0.39382
	480.5	0.37116	480.5	0.40001	480.5	0.48156	480.5	0.53094	480.5	0.39388
	480	0.37174	480	0.40027	480	0.48187	480	0.53127	480	0.39413
	479.5	0.37193	479.5	0.40039	479.5	0.48198	479.5	0.53179	479.5	0.39424
	479	0.37203	479	0.40031	479	0.48229	479	0.5322	479	0.39444
	478.5	0.37212	478.5	0.40038	478.5	0.48259	478.5	0.53255	478.5	0.39472
	478	0.37201	478	0.40027	478	0.48265	478	0.53306	478	0.3952
	477.5	0.37235	477.5	0.40035	477.5	0.48313	477.5	0.53382	477.5	0.39539
	477	0.37253	477	0.40057	477	0.48281	477	0.53398	477	0.39537
	476.5	0.37262	476.5	0.40058	476.5	0.48313	476.5	0.5347	476.5	0.39558
	476	0.3729	476	0.40092	476	0.48328	476	0.53473	476	0.39551
	475.5	0.37311	475.5	0.40088	475.5	0.4837	475.5	0.53522	475.5	0.39594
	475	0.37346	475	0.40121	475	0.48417	475	0.53602	475	0.39629
	474.5	0.37373	474.5	0.40158	474.5	0.48435	474.5	0.53676	474.5	0.3967
	474	0.3741	474	0.40184	474	0.48512	474	0.53779	474	0.39738
	473.5	0.37456	473.5	0.40215	473.5	0.48554	473.5	0.53824	473.5	0.39756
	473	0.37468	473	0.40207	473	0.4859	473	0.53855	473	0.3977
	472.5	0.37479	472.5	0.4024	472.5	0.48625	472.5	0.53921	472.5	0.39804
	472	0.37502	472	0.40264	472	0.48616	472	0.53942	472	0.39798
	471.5	0.37542	471.5	0.4033	471.5	0.48671	471.5	0.5403	471.5	0.39818
	471	0.37564	471	0.40333	471	0.48666	471	0.54061	471	0.39839
	470.5	0.37631	470.5	0.40364	470.5	0.48713	470.5	0.54137	470.5	0.39879
	470	0.37664	470	0.40363	470	0.48748	470	0.5419	470	0.39948
	469.5	0.37717	469.5	0.40427	469.5	0.48777	469.5	0.5425	469.5	0.39981
	469	0.37723	469	0.40462	469	0.48841	469	0.54288	469	0.40018
	468.5	0.37756	468.5	0.40484	468.5	0.48861	468.5	0.5438	468.5	0.40062
	468	0.37794	468	0.40508	468	0.48905	468	0.54426	468	0.40092
	467.5	0.37837	467.5	0.40531	467.5	0.4895	467.5	0.54535	467.5	0.40139
	467	0.37892	467	0.40568	467	0.48959	467	0.54603	467	0.40203
	466.5	0.37933	466.5	0.40612	466.5	0.49002	466.5	0.54682	466.5	0.40258
	466	0.37954	466	0.4062	466	0.49014	466	0.54739	466	0.40296
	465.5	0.38017	465.5	0.4068	465.5	0.49086	465.5	0.54827	465.5	0.40356
	465	0.38009	465	0.40666	465	0.49113	465	0.5487	465	0.40358
	464.5	0.38062	464.5	0.407	464.5	0.49154	464.5	0.54963	464.5	0.40417
	464	0.38075	464	0.40705	464	0.49185	464	0.54981	464	0.40426
	463.5	0.38131	463.5	0.40762	463.5	0.49225	463.5	0.55048	463.5	0.40456
	463	0.38194	463	0.40828	463	0.49265	463	0.55131	463	0.40523
	462.5	0.38212	462.5	0.40852	462.5	0.49278	462.5	0.55172	462.5	0.40552
	462	0.38265	462	0.40903	462	0.49298	462	0.55268	462	0.40604
	461.5	0.38319	461.5	0.40923	461.5	0.49332	461.5	0.55356	461.5	0.40664
	461	0.38326	461	0.40966	461	0.49367	461	0.55414	461	0.40682
	460.5	0.38373	460.5	0.41015	460.5	0.49394	460.5	0.55508	460.5	0.40747
	460	0.38359	460	0.41009	460	0.49409	460	0.55508	460	0.40768
	459.5	0.38444	459.5	0.41077	459.5	0.49467	459.5	0.55629	459.5	0.40843
	459	0.38499	459	0.41088	459	0.49488	459	0.55705	459	0.40907
	458.5	0.38575	458.5	0.41129	458.5	0.4955	458.5	0.55791	458.5	0.40982
	458	0.38642	458	0.41157	458	0.49571	458	0.55852	458	0.41018
	457.5	0.38671	457.5	0.41206	457.5	0.49614	457.5	0.55925	457.5	0.41105
	457	0.3872	457	0.41268	457	0.4962	457	0.55974	457	0.41125
	456.5	0.3876	456.5	0.41305	456.5	0.49619	456.5	0.56064	456.5	0.41166
	456	0.38795	456	0.41355	456	0.49672	456	0.56124	456	0.41209
	455.5	0.38851	455.5	0.41397	455.5	0.49692	455.5	0.56194	455.5	0.41249
	455	0.38881	455	0.41401	455	0.49735	455	0.56272	455	0.41319
	454.5	0.38931	454.5	0.41444	454.5	0.49773	454.5	0.56347	454.5	0.41388
	454	0.38972	454	0.41462	454	0.49781	454	0.56422	454	0.41402
	453.5	0.39036	453.5	0.41517	453.5	0.49828	453.5	0.56502	453.5	0.41455
	453	0.39057	453	0.4155	453	0.49817	453	0.56526	453	0.41439
	452.5	0.39107	452.5	0.41609	452.5	0.49856	452.5	0.56595	452.5	0.41489
	452	0.39107	452	0.41646	452	0.49839	452	0.56627	452	0.41518
	451.5	0.39171	451.5	0.4167	451.5	0.49874	451.5	0.56732	451.5	0.41589
	451	0.39182	451	0.41698	451	0.49899	451	0.56813	451	0.4165
	450.5	0.39227	450.5	0.41741	450.5	0.49963	450.5	0.56903	450.5	0.41746
	450	0.39246	450	0.41763	450	0.50002	450	0.56969	450	0.41743
	449.5	0.39282	449.5	0.41804	449.5	0.50024	449.5	0.5704	449.5	0.41788
	449	0.39336	449	0.41823	449	0.50013	449	0.57061	449	0.4179
	448.5	0.394	448.5	0.41886	448.5	0.50033	448.5	0.57147	448.5	0.41829
	448	0.39424	448	0.41923	448	0.50036	448	0.5718	448	0.4187
	447.5	0.3948	447.5	0.4196	447.5	0.50085	447.5	0.57264	447.5	0.41907
	447	0.39479	447	0.41989	447	0.50093	447	0.57323	447	0.41939
	446.5	0.39517	446.5	0.42008	446.5	0.50101	446.5	0.57386	446.5	0.41991
	446	0.39511	446	0.42019	446	0.50128	446	0.57445	446	0.41981
	445.5	0.39524	445.5	0.42054	445.5	0.50115	445.5	0.57484	445.5	0.41988
	445	0.39555	445	0.42068	445	0.50155	445	0.57516	445	0.42025
	444.5	0.39589	444.5	0.42105	444.5	0.50153	444.5	0.57598	444.5	0.42039
	444	0.39629	444	0.42128	444	0.5016	444	0.57645	444	0.42101
	443.5	0.39659	443.5	0.42137	443.5	0.50174	443.5	0.57716	443.5	0.42122
	443	0.39671	443	0.42183	443	0.50164	443	0.57773	443	0.42125
	442.5	0.39676	442.5	0.42197	442.5	0.50184	442.5	0.57798	442.5	0.42151
	442	0.39673	442	0.42227	442	0.50172	442	0.57834	442	0.42129
	441.5	0.39708	441.5	0.42251	441.5	0.50172	441.5	0.57915	441.5	0.42135
	441	0.39732	441	0.4225	441	0.50177	441	0.57926	441	0.4217
	440.5	0.39719	440.5	0.42254	440.5	0.50156	440.5	0.57979	440.5	0.42185
	440	0.39751	440	0.42255	440	0.5018	440	0.58013	440	0.42229
	439.5	0.39741	439.5	0.42254	439.5	0.50185	439.5	0.58076	439.5	0.42262
	439	0.39769	439	0.42275	439	0.50175	439	0.58163	439	0.42263
	438.5	0.39796	438.5	0.42282	438.5	0.5017	438.5	0.58184	438.5	0.42303
	438	0.39759	438	0.42284	438	0.50125	438	0.5821	438	0.42268
	437.5	0.39762	437.5	0.42273	437.5	0.50093	437.5	0.58272	437.5	0.42238
	437	0.39742	437	0.42264	437	0.50069	437	0.58265	437	0.42243
	436.5	0.39756	436.5	0.42277	436.5	0.50059	436.5	0.58332	436.5	0.42279
	436	0.3976	436	0.42267	436	0.50045	436	0.58318	436	0.42283
	435.5	0.39784	435.5	0.42277	435.5	0.50059	435.5	0.58357	435.5	0.42296
	435	0.39806	435	0.42265	435	0.50059	435	0.58409	435	0.42242
	434.5	0.39803	434.5	0.42229	434.5	0.50068	434.5	0.58446	434.5	0.42248
	434	0.39782	434	0.42235	434	0.50044	434	0.5851	434	0.42255
	433.5	0.3976	433.5	0.42214	433.5	0.50002	433.5	0.5851	433.5	0.42223
	433	0.39717	433	0.42235	433	0.49966	433	0.58507	433	0.42258
	432.5	0.39725	432.5	0.42222	432.5	0.49946	432.5	0.58531	432.5	0.42254
	432	0.39728	432	0.42214	432	0.4996	432	0.5857	432	0.42272
	431.5	0.39729	431.5	0.42232	431.5	0.49957	431.5	0.58606	431.5	0.42251
	431	0.39711	431	0.42172	431	0.49935	431	0.58646	431	0.42194
	430.5	0.39695	430.5	0.42153	430.5	0.4991	430.5	0.5867	430.5	0.42186
	430	0.39662	430	0.42125	430	0.49898	430	0.58712	430	0.42172
	429.5	0.39644	429.5	0.42104	429.5	0.49875	429.5	0.58729	429.5	0.42159
	429	0.3957	429	0.42098	429	0.49836	429	0.58714	429	0.42155
	428.5	0.39535	428.5	0.42048	428.5	0.49808	428.5	0.58744	428.5	0.42133
	428	0.39518	428	0.42056	428	0.49791	428	0.58739	428	0.42117
	427.5	0.39542	427.5	0.42029	427.5	0.49789	427.5	0.58756	427.5	0.42101
	427	0.39554	427	0.42005	427	0.49785	427	0.58792	427	0.42061
	426.5	0.3953	426.5	0.4198	426.5	0.49776	426.5	0.58834	426.5	0.42012
	426	0.39508	426	0.41941	426	0.49759	426	0.58842	426	0.41981
	425.5	0.3947	425.5	0.41924	425.5	0.49726	425.5	0.58883	425.5	0.41946
	425	0.39434	425	0.41882	425	0.49697	425	0.58839	425	0.41932
	424.5	0.39392	424.5	0.41861	424.5	0.49693	424.5	0.58807	424.5	0.41907
	424	0.39298	424	0.4183	424	0.49661	424	0.5874	424	0.41825
	423.5	0.39238	423.5	0.41815	423.5	0.49698	423.5	0.58761	423.5	0.41769
	423	0.39217	423	0.41801	423	0.49705	423	0.58818	423	0.41732
	422.5	0.39165	422.5	0.41793	422.5	0.49708	422.5	0.58874	422.5	0.41708
	422	0.39187	422	0.41784	422	0.49717	422	0.58871	422	0.41705
	421.5	0.39105	421.5	0.41742	421.5	0.49681	421.5	0.58842	421.5	0.41618
	421	0.39098	421	0.41711	421	0.49706	421	0.58808	421	0.41588
	420.5	0.39055	420.5	0.41666	420.5	0.49716	420.5	0.58851	420.5	0.41545
	420	0.39087	420	0.41624	420	0.49623	420	0.58881	420	0.41618
	419.5	0.39037	419.5	0.41606	419.5	0.49591	419.5	0.5889	419.5	0.41585
	419	0.38976	419	0.41518	419	0.49574	419	0.58913	419	0.41557
	418.5	0.38957	418.5	0.41486	418.5	0.49587	418.5	0.58919	418.5	0.41569
	418	0.38955	418	0.41458	418	0.49626	418	0.58971	418	0.41547
	417.5	0.38898	417.5	0.41418	417.5	0.49659	417.5	0.58989	417.5	0.41515
	417	0.38887	417	0.41415	417	0.49654	417	0.58992	417	0.41519
	416.5	0.38868	416.5	0.4144	416.5	0.49666	416.5	0.59029	416.5	0.41503
	416	0.38861	416	0.41459	416	0.49638	416	0.59021	416	0.41502
	415.5	0.38821	415.5	0.4141	415.5	0.49618	415.5	0.59072	415.5	0.41448
	415	0.38764	415	0.41333	415	0.49584	415	0.59111	415	0.41374
	414.5	0.38775	414.5	0.41305	414.5	0.49613	414.5	0.59141	414.5	0.41387
	414	0.38734	414	0.41264	414	0.4963	414	0.59138	414	0.41382
	413.5	0.38726	413.5	0.41206	413.5	0.4963	413.5	0.59192	413.5	0.41409
	413	0.38708	413	0.41198	413	0.49634	413	0.59197	413	0.41405
	412.5	0.38708	412.5	0.41194	412.5	0.49646	412.5	0.59272	412.5	0.41409
	412	0.38739	412	0.41243	412	0.49684	412	0.59237	412	0.41397
	411.5	0.3878	411.5	0.41253	411.5	0.49736	411.5	0.59293	411.5	0.41433
	411	0.3877	411	0.41256	411	0.49728	411	0.59327	411	0.41395
	410.5	0.38811	410.5	0.41251	410.5	0.4977	410.5	0.59401	410.5	0.41418
	410	0.388	410	0.41215	410	0.49787	410	0.59441	410	0.4141
	409.5	0.38805	409.5	0.41211	409.5	0.49842	409.5	0.59503	409.5	0.41452
	409	0.38812	409	0.41205	409	0.49922	409	0.59528	409	0.41486
	408.5	0.38831	408.5	0.4126	408.5	0.49992	408.5	0.59673	408.5	0.4159
	408	0.38848	408	0.41273	408	0.50026	408	0.5968	408	0.41557
	407.5	0.38901	407.5	0.41288	407.5	0.50058	407.5	0.59799	407.5	0.41592
	407	0.38872	407	0.41304	407	0.50041	407	0.59822	407	0.41569
	406.5	0.38901	406.5	0.41321	406.5	0.50119	406.5	0.59884	406.5	0.4157
	406	0.38868	406	0.41364	406	0.50161	406	0.59963	406	0.4165
	405.5	0.38894	405.5	0.4138	405.5	0.5024	405.5	0.60042	405.5	0.41657
	405	0.38944	405	0.414	405	0.50292	405	0.60119	405	0.4174
	404.5	0.39023	404.5	0.41466	404.5	0.50375	404.5	0.60239	404.5	0.41799
	404	0.39084	404	0.41518	404	0.50449	404	0.60297	404	0.41815
	403.5	0.39096	403.5	0.41529	403.5	0.50525	403.5	0.60373	403.5	0.41865
	403	0.39132	403	0.41593	403	0.50595	403	0.60421	403	0.41929
	402.5	0.39189	402.5	0.41595	402.5	0.50691	402.5	0.60528	402.5	0.42015
	402	0.39202	402	0.41664	402	0.50733	402	0.60653	402	0.42105
	401.5	0.39275	401.5	0.41724	401.5	0.50782	401.5	0.60767	401.5	0.42168
	401	0.39288	401	0.4175	401	0.50811	401	0.60817	401	0.42188
	400.5	0.39367	400.5	0.41818	400.5	0.50885	400.5	0.60922	400.5	0.42259
	400	0.39423	400	0.41854	400	0.50969	400	0.60952	400	0.42259
							--	--	--	--
							--	--	--	--
							--	--	--	--
